# Supplementary material for: Prevalence of idiopathic scoliosis in athletes: a systematic review and meta-analysis
Source: HighWire-hosted journal article supplement (doi:10.1136/bmjsem-2022-001312), 2022-08-01
Supplement: bmjsem-2022-001312supp003_data_supplement.pdf [file bmjsem-2022-001312supp003_data_supplement.pdf]

**Appendix 3. Characteristics of included studies****Table 1.** Characteristics of included studies that didn't use in data pooling (quality assessment score/ risk of bias score)

|   | <i>First author</i> | <i>Year</i> | <i>Language</i> | <i>Sample size</i> | <i>n Athletes</i> | <i>Age</i>         | <i>Gender</i> | <i>Sports fields</i>            | <i>Sports activity levels</i> | <i>Assessment method</i>                          | <i>Quality score</i> | <i>Risk of bias</i> |
|---|---------------------|-------------|-----------------|--------------------|-------------------|--------------------|---------------|---------------------------------|-------------------------------|---------------------------------------------------|----------------------|---------------------|
| 1 | Becker              | 1986        | English         | 336                | 336               | Adolescent         | F& M*         | Swimming                        | Competitive                   | Adam's test**                                     | 5                    | 1                   |
| 2 | Hamilton            | 1992        | English         | 28                 | 28                | Adult              | F& M          | Ballet dance                    | Competitive                   | Adam's test                                       | 5                    | 3                   |
| 3 | Ogon                | 2001        | English         | 120                | 120               | Adolescent & adult | F& M          | Ski                             | Competitive                   | X-ray (thoracolumbar and lumbar spine)            | 5                    | 2                   |
| 4 | Vařeková            | 2011        | English         | 62                 | 62                | Adult              | F             | Volleyball                      | Competitive                   | Adam's test                                       | 5                    | 3                   |
| 5 | Zaina               | 2014        | English         | 329                | 112               | Adolescent         | F& M          | Swimming                        | Competitive                   | Scoliometer                                       | 6                    | 3                   |
| 6 | Ramos-Álvarez       | 2016        | English         | 102                | 102               | Adolescent         | F& M          | Swimming, fencing and badminton | Competitive                   | X-ray                                             | 6                    | 2                   |
| 7 | Langdon             | 2016        | English         | 207                | 207               | Adolescent & adult | M             | Rugby                           | Recreational & competitive    | Posture Analysis (WMPA)                           | 5                    | 4                   |
| 8 | Lotfian             | 2017        | English         | 244                | 244               |                    | M             | Football                        | Competitive                   | Spinal mouse                                      | 5                    | 4                   |
| 9 | Snodgrass           | 2021        | English         | 263                | 263               | Adolescent         | M             | Football                        | Competitive                   | Photograph, modified Watson and Mac Donncha scale | 5                    | 4                   |

\*F=Female, M=Male \*\*researchers just used this test without using scoliometer.

**Table 2.** Characteristics of studies included in data pooling (quality assessment score/ risk of bias score)

|           | <i>First author</i> | <i>Year</i> | <i>Language</i> | <i>Sample size</i> | <i>n Athletes</i> | <i>Age</i>         | <i>Gender</i> | <i>Sports fields</i>                                                                       | <i>Sports activity levels</i> | <i>Assessment method</i>                                        | <i>Quality score</i> | <i>Risk of bias</i> |
|-----------|---------------------|-------------|-----------------|--------------------|-------------------|--------------------|---------------|--------------------------------------------------------------------------------------------|-------------------------------|-----------------------------------------------------------------|----------------------|---------------------|
| <b>1</b>  | <b>Warren</b>       | 1986        | English         | 75                 | 75                | Adult              | F             | Ballet dance                                                                               | Recreational                  | X-ray                                                           | 7                    | 3                   |
| <b>2</b>  | <b>Hellström</b>    | 1990        | English         | 173                | 143               | Adolescent & adult | F&M           | Wrestlers (30), Gymnasts (F:26/M:26), Male athletes pooled (117), Tennis (30), Soccer (31) | Elit                          | X-ray, lower half of the thoracic and lumbar and half of sacrum | 7                    | 0                   |
| <b>3</b>  | <b>Campos 1</b>     | 1997        | English         | 371                | 371               | Adolescent         | F&M           | 27 different types                                                                         | Elit                          | X-ray                                                           | 7                    | 2                   |
| <b>4</b>  | <b>Campos 2</b>     | 1997        | English         | 70                 | 70                | Adolescent         | F&M           | Basketball                                                                                 | Elit                          | X-ray                                                           | 7                    | 2                   |
| <b>5</b>  | <b>Tanchev</b>      | 2000        | English         | 4900               | 100               | Adolescent         | F             | Gymnastic                                                                                  | Recreational                  | X-ray                                                           | 8                    | 2                   |
| <b>6</b>  | <b>Heitkamp</b>     | 2005        | German          | 41                 | 41                | Child & adolescent | F             | Gymnastic                                                                                  | Recreational                  | X-ray                                                           | 6                    | 4                   |
| <b>7</b>  | <b>Modi</b>         | 2008        | English         | 46544              | 116               | Adolescent         | F&M           | Volleyball                                                                                 | Recreational                  | X-ray                                                           | 8                    | 2                   |
| <b>8</b>  | <b>Trexler</b>      | 2013        | English         | 15                 | 15                | Adult              | F             | Gymnastic                                                                                  | Competitive                   | X-ray                                                           | 6                    | 2                   |
| <b>9</b>  | <b>Steinberg</b>    | 2013        | English         | 1288               | 1288              | Child & adolescent | F             | Ballet dance                                                                               | Recreational                  | Adam's test*                                                    | 7                    | 3                   |
| <b>10</b> | <b>Longworth</b>    | 2014        | English         | 60                 | 30                | Adolescent         | F             | Ballet dance                                                                               | Recreational                  | Scoliometer                                                     | 6                    | 4                   |
| <b>11</b> | <b>Zaina</b>        | 2016        | English         | 305                | 102               | Adolescent         | F&M           | Tennis                                                                                     | Competitive                   | Scoliometer                                                     | 7                    | 2                   |
| <b>12</b> | <b>Watanabe 1</b>   | 2017        | English         | 944                | 944               | Adolescent         | F             | Swimming                                                                                   | Recreational                  | X-ray                                                           | 9                    | 2                   |
| <b>13</b> | <b>Watanabe 2</b>   | 2017        | English         | 117                | 117               | Adolescent         | F             | Rhythmic gymnastics                                                                        | Recreational                  | X-ray                                                           | 9                    | 2                   |
| <b>14</b> | <b>Watanabe 3</b>   | 2017        | English         | 344                | 344               | Adolescent         | F             | Classical ballet                                                                           | Recreational                  | X-ray                                                           | 9                    | 2                   |
| <b>15</b> | <b>Watanabe 4</b>   | 2017        | English         | 320                | 320               | Adolescent         | F             | Dancing                                                                                    | Recreational                  | X-ray                                                           | 9                    | 2                   |
| <b>16</b> | <b>Watanabe 5</b>   | 2017        | English         | 93                 | 93                | Adolescent         | F             | Artistic gymnastic                                                                         | Recreational                  | X-ray                                                           | 9                    | 2                   |
| <b>17</b> | <b>Watanabe 6</b>   | 2017        | English         | 340                | 340               | Adolescent         | F             | Tennis                                                                                     | Recreational                  | X-ray                                                           | 9                    | 2                   |
| <b>18</b> | <b>Watanabe 7</b>   | 2017        | English         | 217                | 217               | Adolescent         | F             | Basketball                                                                                 | Recreational                  | X-ray                                                           | 9                    | 2                   |
| <b>19</b> | <b>Watanabe 8</b>   | 2017        | English         | 229                | 229               | Adolescent         | F             | Badminton                                                                                  | Recreational                  | X-ray                                                           | 9                    | 2                   |
| <b>20</b> | <b>Watanabe 9</b>   | 2017        | English         | 213                | 213               | Adolescent         | F             | Volleyball                                                                                 | Recreational                  | X-ray                                                           | 9                    | 2                   |
| <b>21</b> | <b>Aydin</b>        | 2020        | English         | 679                | 679               | Adult              | F&M           | Swimming                                                                                   | Competitive                   | X-ray                                                           | 6                    | 3                   |
| <b>22</b> | <b>Steinberg</b>    | 2021        | English         | 132                | 132               | Adolescent         | F             | Dance                                                                                      | Recreational                  | Adam's test                                                     | 6                    | 4                   |

\*Adam's test= researchers just used this test without using scoliometer

**Table 3.** Characteristics of included studies (IS\* prevalence/sample size)

|    | <i>First author</i> | <i>Year</i> | <i>Country</i> | <i>Sample</i> | <i>n Athletes</i> | <i>n Control</i> | <i>IS* prevalence in athletes</i>                                                                                                           | <i>IS prevalence in control</i>       |
|----|---------------------|-------------|----------------|---------------|-------------------|------------------|---------------------------------------------------------------------------------------------------------------------------------------------|---------------------------------------|
| 1  | Becker              | 1986        | USA            | 336           | 336               | -                | 16% Mild Functional, structural idiopathic 6/9%                                                                                             | -                                     |
| 2  | Hamilton            | 1992        | USA            | 28            | 28                | -                | 50% of the women and 27% of the male                                                                                                        | -                                     |
| 3  | Ogon                | 2001        | Austria        | 120           | 120               | -                | 24 (20%) mild scoliosis                                                                                                                     | -                                     |
| 4  | Vařeková            | 2011        | Czech          | 62            | 62                | -                | 2 (3.2%)                                                                                                                                    | -                                     |
| 5  | Zaina               | 2014        | Italy          | 329           | 112               | 217              | Odds ratio: 1.86                                                                                                                            | Not reported                          |
| 6  | Ramos-Álvarez       | 2016        | Spain          | 102**         | 102               | 54**             | 2 (8%), a left-thoracic curve, 18° and 20° Cobb for both cases.                                                                             | -                                     |
| 7  | Langdon             | 2016        | Australia      | 207           | 207               | -                | S-Scoliosis, Moderate deviation: (8.2) and Marked deviation: (0.5)-<br>C-Scoliosis, Moderate deviation: (23.7) and Marked deviation: (0.0). | -                                     |
| 8  | Lotfian             | 2017        | Iran           | 244           | 244               | -                | Players with scoliosis 3 (1.2%)                                                                                                             | -                                     |
| 9  | Snodgrass           | 2021        | Australia      | 263           | 263               | -                | 17 (6.5%), Odd ratio: 0.76                                                                                                                  | -                                     |
| 10 | Warren              | 1986        | USA            | 75            | 75                | -                | 18 (24%)                                                                                                                                    | -                                     |
| 11 | Hellström           | 1990        | Sweden         | 173           | 143               | 30 Males         | 29 (20.27%)                                                                                                                                 | Not reported                          |
| 12 | Campos 1            | 1997        | Spain          | 371           | 371               | -                | 44 (11.85%.)                                                                                                                                | -                                     |
| 13 | Campos 2            | 1997        | Spain          | 70            | 70                | -                | (27.27%)                                                                                                                                    | -                                     |
| 14 | Tanchev             | 2000        | Bulgaria       | 4900          | 100               | 4800             | 12 (12%)                                                                                                                                    | 53 (1.1%)                             |
| 15 | Heitkamp            | 2005        | Germany        | 41            | 41                | -                | 2 (4.8%)                                                                                                                                    | -                                     |
| 16 | Modi                | 2008        | South Korea    | 46544         | 116               | 46428            | 6 (5.2%). Cobb Me=12°, Range: 10-15. Odds ratio:6.1                                                                                         | 465(1%). Cobb Me: 24.5°, Range: 10-55 |
| 17 | Trexler             | 2013        | USA            | 15            | 15                | -                | 3 (20%)                                                                                                                                     | -                                     |
| 18 | Steinberg           | 2013        | Israel         | 1288          | 1288              | -                | 307(23.8%)                                                                                                                                  | -                                     |
| 19 | Longworth           | 2014        | Australia      | 60            | 30                | 30               | 9 (30%)                                                                                                                                     | 1 (3.33%)                             |
| 20 | Zaina               | 2016        | Italy          | 305           | 102               | 203              | 6 (0.05%)                                                                                                                                   | 12 (0.05%)                            |
| 21 | Watanabe 1          | 2017        | Japan          | 944           | 944               | -                | 469 (49.7%), Odds ratio: 1.10                                                                                                               | -                                     |
| 22 | Watanabe 2          | 2017        | Japan          | 117           | 117               | -                | 56 (47.9%), Odds ratio: 1.04                                                                                                                | -                                     |
| 23 | Watanabe 3          | 2017        | Japan          | 344           | 344               | -                | 192 (55.8%), Odds ratio: 1.38                                                                                                               | -                                     |
| 24 | Watanabe 4          | 2017        | Japan          | 320           | 320               | -                | 156 (48.8%), Odds ratio: 1.04                                                                                                               | -                                     |
| 25 | Watanabe 5          | 2017        | Japan          | 93            | 93                | -                | 49 (52.7%), Odds ratio 1.19                                                                                                                 | -                                     |
| 26 | Watanabe 6          | 2017        | Japan          | 340           | 340               | -                | 154 (45.3%), Odds ratio: 0.88                                                                                                               | -                                     |
| 27 | Watanabe 7          | 2017        | Japan          | 217           | 217               | -                | 83 (38.3%), Odds ratio: 0.69                                                                                                                | -                                     |
| 28 | Watanabe 8          | 2017        | Japan          | 229           | 229               | -                | 82 (35.8%), Odds ratio: 0.61                                                                                                                | -                                     |
| 29 | Watanabe 9          | 2017        | Japan          | 213           | 213               | -                | 89 (41.8%), Odds ratio: 0.76                                                                                                                | -                                     |
| 30 | Aydin               | 2020        | Turkey         | 679           | 679               | -                | 28 (4.1%)                                                                                                                                   | -                                     |
| 31 | Steinberg           | 2021        | Israel         | 132           | 132               | -                | 38 (28.8%)                                                                                                                                  | -                                     |

\*Idiopathic scoliosis, \*\*Asymmetrical: fencing, badminton=48, symmetrical: swimming=54 that considered control group.
