# Supplementary material for: Prevalence of idiopathic scoliosis in athletes: a systematic review and meta-analysis
Source: HighWire-hosted journal article supplement (doi:10.1136/bmjsem-2022-001312), 2022-08-01
Supplement: bmjsem-2022-001312supp005_data_supplement.pdf [file bmjsem-2022-001312supp005_data_supplement.pdf]

**Appendix 5. Forest plots of subgroup analyses**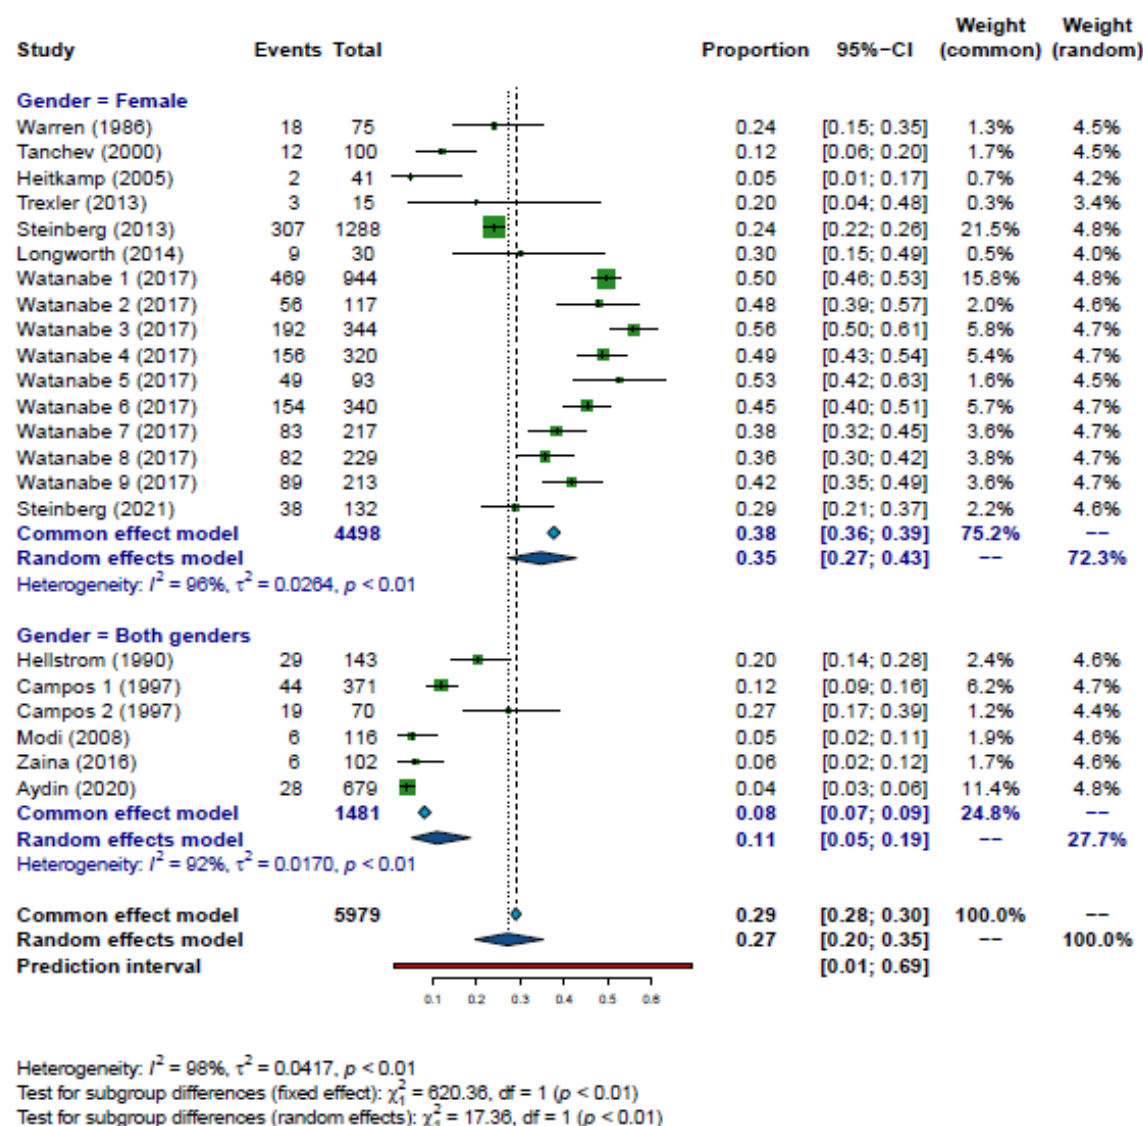

Figure 1. Subgroup analysis for gender

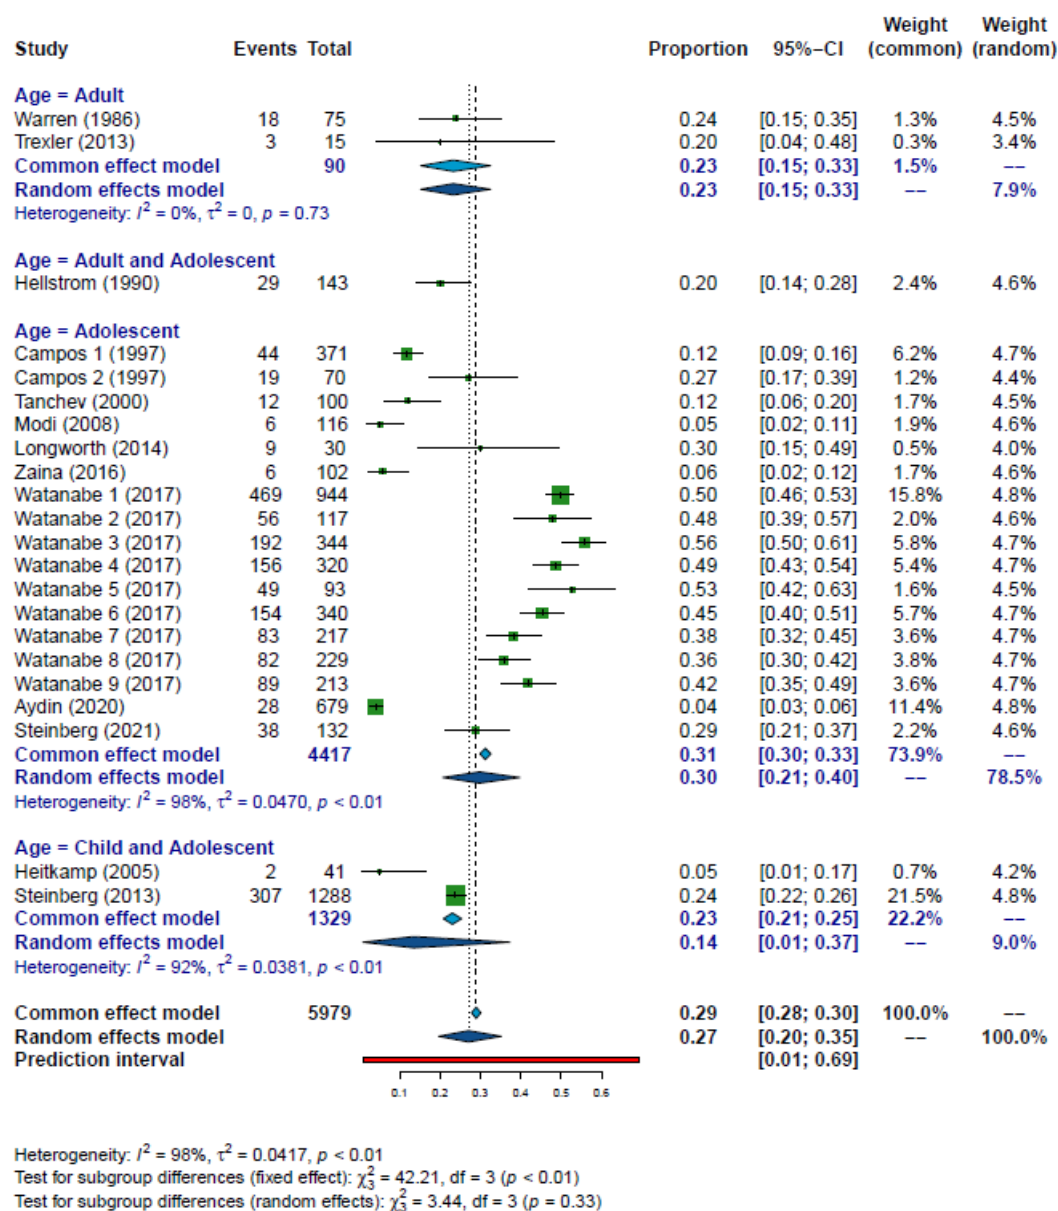

Figure 2. Subgroup analysis for age

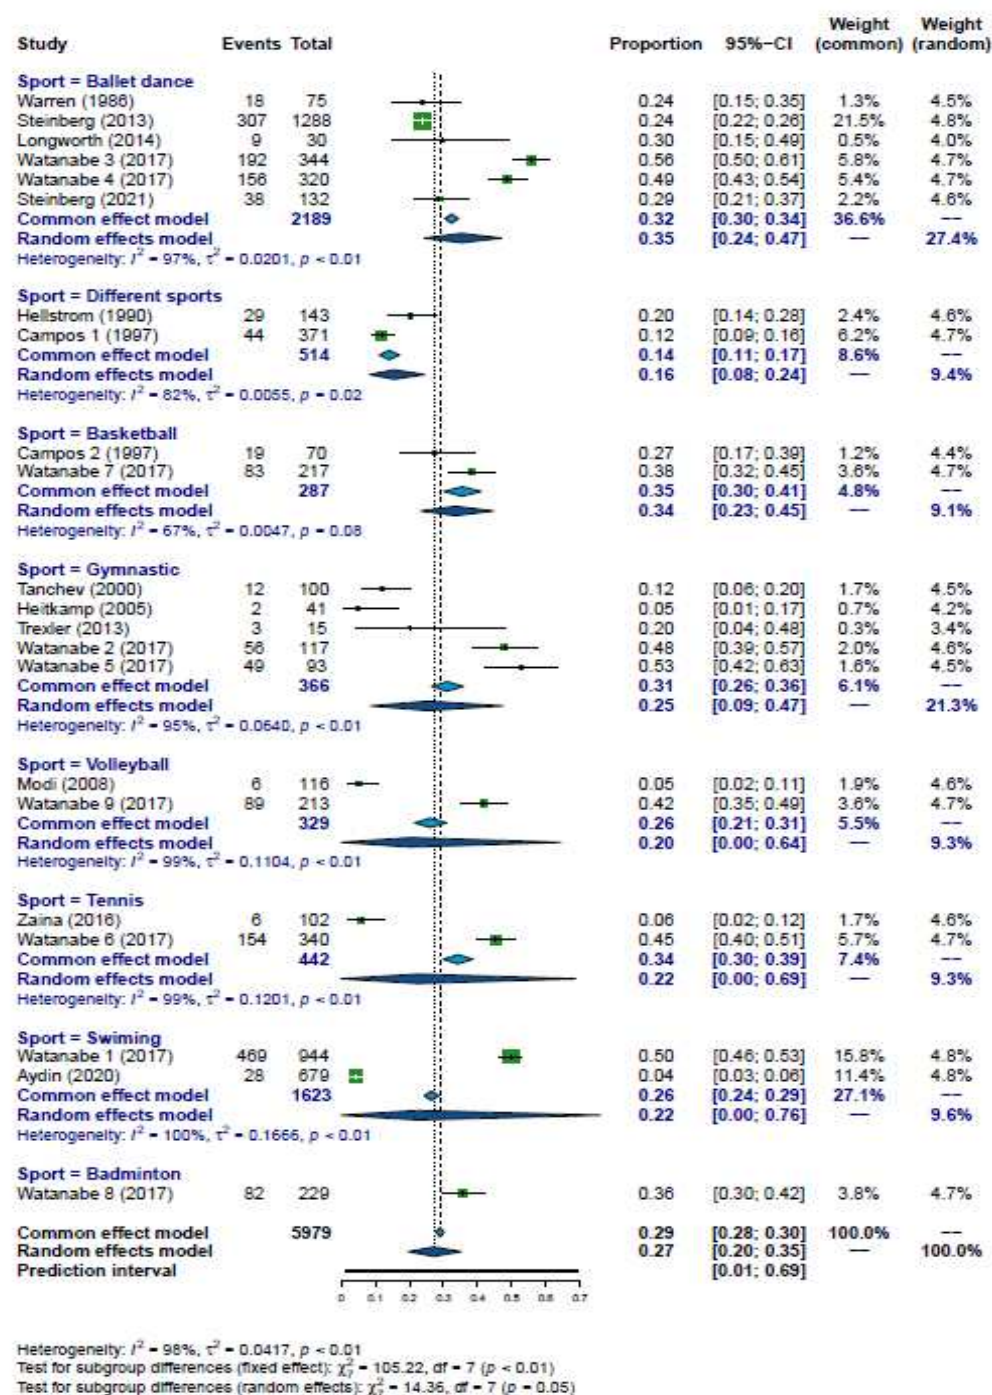

Figure 3. Subgroup analysis for sports feilds

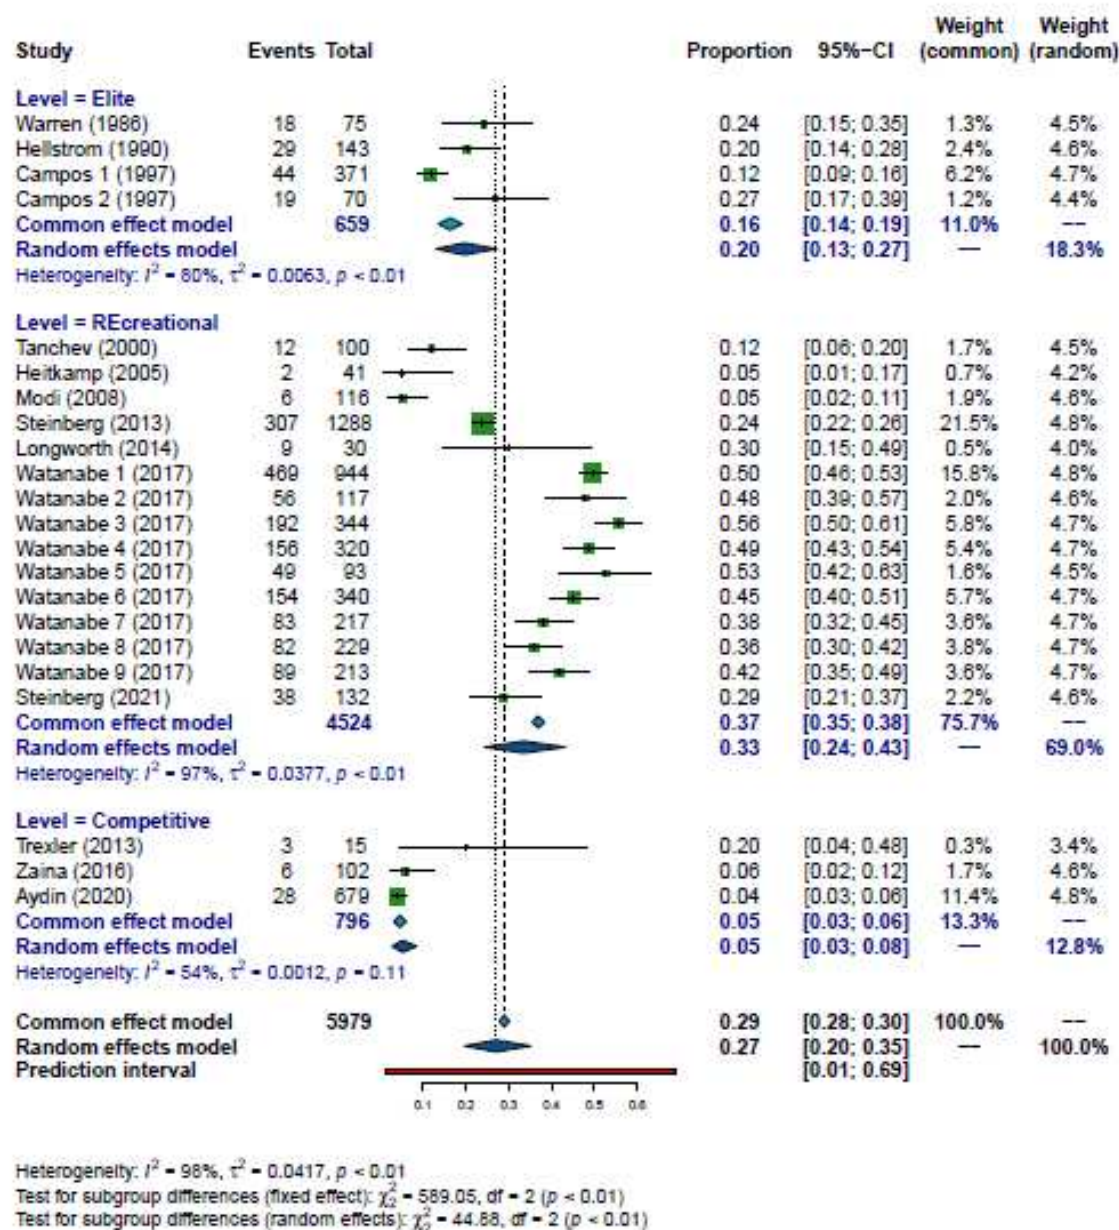

Figure 4. Subgroup analysis for levels of sports activities
