# Supplementary material for: Prevalence of idiopathic scoliosis in athletes: a systematic review and meta-analysis
Source: HighWire-hosted journal article supplement (doi:10.1136/bmjsem-2022-001312), 2022-08-01
Supplement: bmjsem-2022-001312supp007_data_supplement.xlsx [file bmjsem-2022-001312supp007_data_supplement.xlsx]

## Sheet: Sheet1
Authore	PubYear	Country	Language	Study	SampleSize	gender	Age	assessment	QualityScore	RiskofBiase	nathlete	ncontrol	limit	OddRatio	CILowAthOdd	CIUppAthOdd	level	sport	PscolioA	PscolioC	scolioa
Warren (1986)	1986	USA	English	Observational study	75	1	1	1	7	3	75	0					3	1	0.24		18
Hellstrom (1990)	1990	Sweden	English	Case control	173	3	5	1	7	0	143	30	2	8.3			4	8	0.2027	0.033	29
Campos 1 (1997)	1997	Spain	English	Cross sectional	371	3	2	1	7	3	371	0	1				4	8	0.1185		44
Campos 2 (1997)	1997	Spain	English	Cross sectional	70	3	2	1	7	3	70	0	1				4	5	0.2142		15
Tanchev (2000)	2000	Bulgaria	English	Case control	4900	1	2	1	8	2	100	4800	2	13			1	4	0.12	0.011	12
Heitkamp (2005)	2005	German	German	Cross sectional	41	1	4	1	6	4	41	0	2				1	4	0.048		2
Modi (2008)	2008	Korea	English	Case control	46544	3	2	1	8	2	116	46428	2	6.1	3.2	12.1	1	6	0.052	0.001	6
Trexler (2013)	2013	USA	English	Pilot study	15	1	1	1	6	2	15	0	2				2	4	0.2		3
Steinberg (2013)	2013	Isreal	English	Cross sectional	1288	1	4	2	7	3	1288	0					1	1	0.238		307
Longworth (2014)	2014	Western Australia	English	Case control	60	1	2	2	6	4	30	30	4	12.4			1	1	0.3	0.0333	9
Zaina (2016)	2016	Italy	English	Case control	305	3	2	2	7	2	102	203	5	0.99	0.36	2.72	2	3	0.06	0.06	6
Watanabe 1 (2017)	2017	Japan	English	Cross sectional	944	1	2	1	9	2	944		3	1.1	0.93	1.29	1	2	0.497		469
Watanabe 2 (2017)	2017	Japan	English	Cross sectional	117	1	2	1	9	2	117		3	1.4	0.71	1.52	1	4	0.479		56
Watanabe 3 (2017)	2017	Japan	English	Cross sectional	344	1	2	1	9	2	344		3	1.38	1.09	1.75	1	1	0.558		192
Watanabe 4 (2017)	2017	Japan	English	Cross sectional	320	1	2	1	9	2	320		3	1.04	0.82	1.32	1	1	0.488		156
Watanabe 5 (2017)	2017	Japan	English	Cross sectional	93	1	2	1	9	2	93		3	1.19	0.78	1.81	1	4	0.527		49
Watanabe 6 (2017)	2017	Japan	English	Cross sectional	340	1	2	1	9	2	340		3	0.88	0.7	1.11	1	3	0.453		154
Watanabe 7 (2017)	2017	Japan	English	Cross sectional	217	1	2	1	9	2	217		3	0.69	0.51	0.92	1	5	0.383		83
Watanabe 8 (2017)	2017	Japan	English	Cross sectional	229	1	2	1	9	2	229		3	0.61	0.45	0.81	1	7	0.358		82
Watanabe 9 (2017)	2017	Japan	English	Cross sectional	213	1	2	1	9	2	213		3	0.76	0.57	1.01	1	6	0.418		89
Aydin (2020)	2020	Turkey	English	Observational study	679	3	2	1	6	3	679	0	2				2	2	0.041		28
Steinberg (2021)	2021	Isreal	English	Cross sectional	132	1	2	2	6	4	132	0					1	1	0.238		38
